# Supplementary material for: Investigation of slow magnetic relaxation in a series of 1D polymeric cyclobutane-1,1-dicarboxylates based on LnIIIVIV2 units (LnIII = Tb, Dy, Ho, Er, Tm, Yb): rare examples of VIV-4f single-molecule magnets
Source: Royal Society of Chemistry journal article supplement (doi:10.1039/d4dt01779j), 2024-01-01
Supplement: d4dt01779j1.pdf [file d4dt01779j1.pdf]

## Supplementary Information

for paper

### **Investigation of slow magnetic relaxation in a series of 1D polymeric cyclobutane-1,1-dicarboxylates based on $\text{Ln}^{\text{III}}\text{V}^{\text{IV}}_2$ units ( $\text{Ln}^{\text{III}} = \text{Tb}, \text{Dy}, \text{Ho}, \text{Er}, \text{Tm}, \text{Yb}$ ): rare examples of $\text{V}^{\text{IV}}\text{-4f}$ single-molecule magnets**

Evgeniya S. Bazhina,<sup>a,\*</sup> Maxim A. Shmelev,<sup>a</sup> Natalia V. Gogoleva,<sup>a</sup> Konstantin A. Babeshkin,<sup>a</sup> Ivan V. Kurganskii,<sup>b</sup> Nikolay N. Efimov,<sup>a</sup> Matvey V. Fedin,<sup>b</sup> Mikhail A. Kiskin<sup>a</sup> and Igor L. Eremenko<sup>a</sup>

<sup>a</sup> N.S. Kurnakov Institute of General and Inorganic Chemistry of the Russian Academy of Sciences, Leninsky prosp. 31, Moscow 119991, Russian Federation

E-mail: [bazhina@igic.ras.ru](mailto:bazhina@igic.ras.ru)

<sup>b</sup> International Tomography Center, Siberian Branch of Russian Academy of Sciences, Institutskaya St. 3a, Novosibirsk 630090, Russian Federation

# Table of contents

|                                                   |           |
|---------------------------------------------------|-----------|
| Figure S1.....                                    | 3         |
| <b>Powder XRD patterns.....</b>                   | <b>3</b>  |
| Figure S2.....                                    | 3         |
| <b>The description of crystal structures.....</b> | <b>4</b>  |
| Table S1.....                                     | 4         |
| Table S2.....                                     | 4         |
| Table S3.....                                     | 4         |
| Table S4.....                                     | 5         |
| Table S5.....                                     | 5         |
| <b>Magnetic properties.....</b>                   | <b>6</b>  |
| Figure S3–S6.....                                 | 6         |
| Figure S7–S9.....                                 | 7         |
| Figure S10–S12.....                               | 8         |
| Figure S13–S15.....                               | 9         |
| Figure S16–S18.....                               | 10        |
| Figure S19–S21.....                               | 11        |
| Figure S22–S23.....                               | 12        |
| Table S6–S8.....                                  | 12        |
| Figure S24.....                                   | 13        |
| Table S19.....                                    | 13        |
| <b>EPR spectroscopy.....</b>                      | <b>14</b> |
| Figure S25.....                                   | 14        |
| <b>IR spectroscopy</b>                            |           |
| Figure S26.....                                   | 15        |

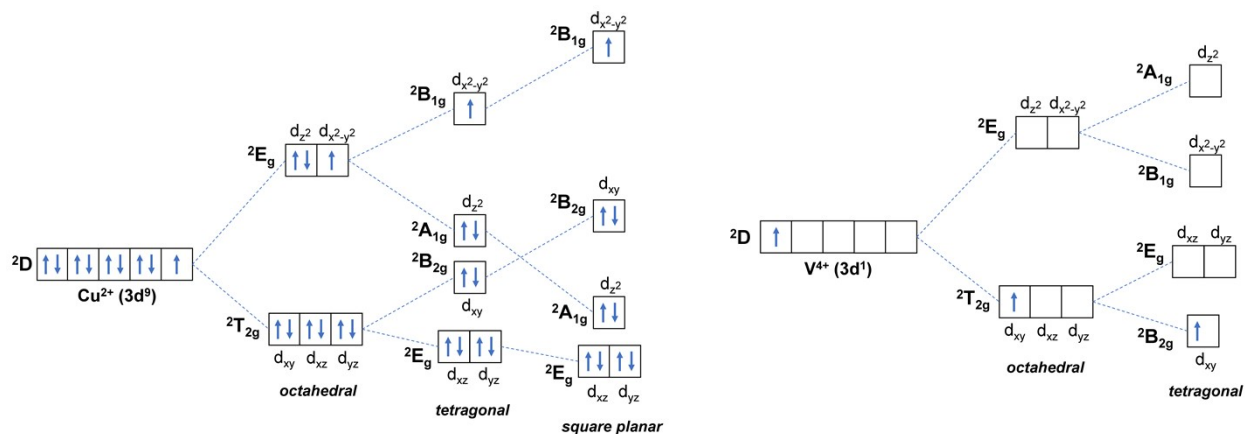

**Figure S1.** Splitting of the energy levels of  $\text{Cu}^{II}$  ( $3d^9$ ) (left) and  $\text{V}^{IV}$  ( $3d^1$ ) ion (right) in different crystal fields.

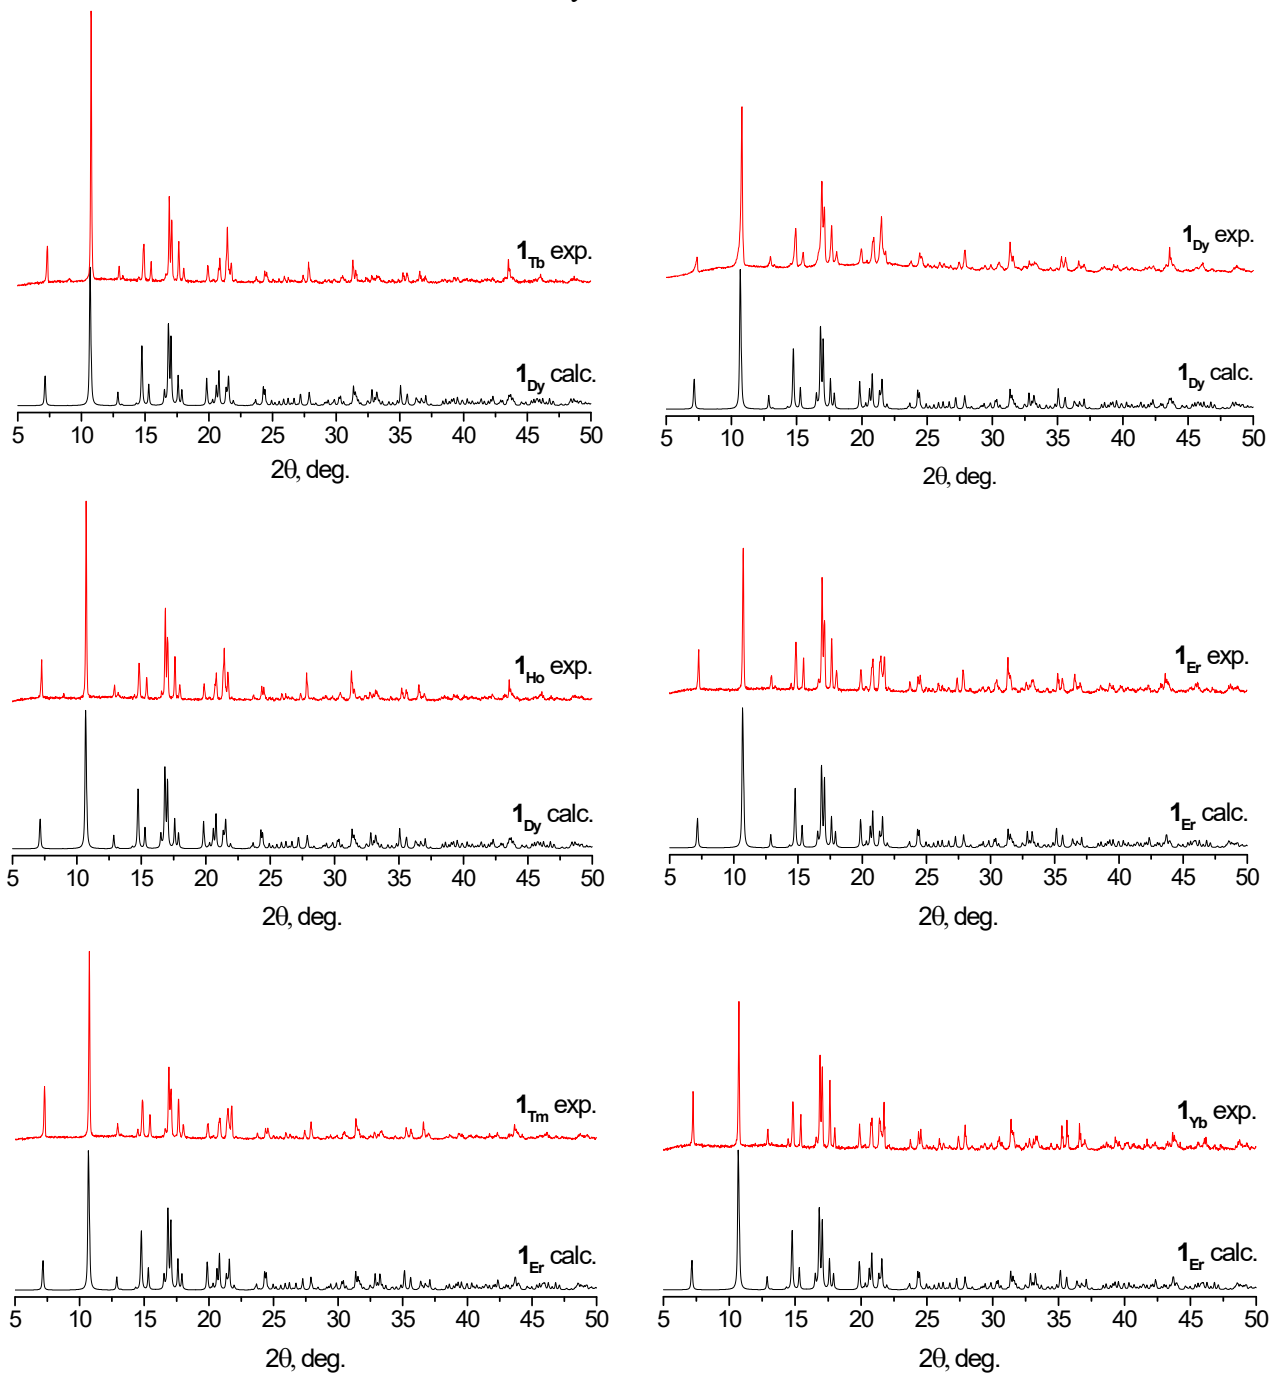

**Figure S2.** Experimental PXR patterns for  $1_{Ln}$  measured at 295 K and their comparison with calculated data.

## The description of crystal structures

**Table S1.** Continuous shape measures (CShM) for DyO<sub>8</sub> and ErO<sub>8</sub> coordination polyhedra in compounds **1<sub>Dy</sub>** and **1<sub>Er</sub>**. The lowest SHAPE values are shown highlighted indicating best fits.

| Structure ML <sub>8</sub> | SAPR-8 | TDD-8        | JBTPR-8 | BTPR-8 | JSD-8 |
|---------------------------|--------|--------------|---------|--------|-------|
| <b>1<sub>Dy</sub></b>     | 1.556  | <b>0.630</b> | 3.118   | 2.501  | 3.874 |
| <b>1<sub>Er</sub></b>     | 1.542  | <b>0.640</b> | 3.135   | 2.498  | 3.919 |

Codes: SAPR-8 (D4d) Square antiprism; TDD-8 (D2d) Triangular dodecahedron; JBTPR-8 (C2v) Biaugmented trigonal prism J50; BTPR-8 (C2v) Biaugmented trigonal prism; JSD-8 (D2d) Snub diphenoid J84.

**Table S2.** Selected bond angles ( $\omega$ , deg.) for **1<sub>Dy</sub>**.

| Angle                                  | $\omega$   | Angle                                  | $\omega$   |
|----------------------------------------|------------|----------------------------------------|------------|
| O10–Dy1–O10 <sup>i</sup>               | 143.81(10) | O12–Dy1–O13                            | 120.00(9)  |
| O10 <sup>i</sup> –Dy1–O13              | 68.11(8)   | O12–Dy1–O13 <sup>i</sup>               | 132.00(8)  |
| O10 <sup>i</sup> –Dy1–O13 <sup>i</sup> | 147.31(7)  | O12 <sup>i</sup> –Dy1–O13 <sup>i</sup> | 120.00(9)  |
| O10–Dy1–O13                            | 147.31(7)  | O12 <sup>i</sup> –Dy1–O13              | 132.00(8)  |
| O10–Dy1–O13 <sup>i</sup>               | 68.11(8)   | O12–Dy1–O12 <sup>i</sup>               | 78.45(12)  |
| O10–Dy1–O11 <sup>i</sup>               | 90.65(8)   | O12–Dy1–O11 <sup>i</sup>               | 71.58(8)   |
| O10 <sup>i</sup> –Dy1–O11              | 90.65(8)   | O12 <sup>i</sup> –Dy1–O11 <sup>i</sup> | 149.65(8)  |
| O10–Dy1–O11                            | 102.00(8)  | O12 <sup>i</sup> –Dy1–O11              | 71.58(8)   |
| O10 <sup>i</sup> –Dy1–O11 <sup>i</sup> | 102.00(8)  | O12–Dy1–O11                            | 149.65(8)  |
| O13–Dy1–O13 <sup>i</sup>               | 82.02(12)  | O11–Dy1–O13                            | 78.87(9)   |
| O12 <sup>i</sup> –Dy1–O10 <sup>i</sup> | 75.18(8)   | O11–Dy1–O13 <sup>i</sup>               | 70.14(8)   |
| O12 <sup>i</sup> –Dy1–O10              | 76.97(8)   | O11 <sup>i</sup> –Dy1–O13              | 70.14(8)   |
| O12–Dy1–O10                            | 75.18(8)   | O11 <sup>i</sup> –Dy1–O13 <sup>i</sup> | 78.87(9)   |
| O12–Dy1–O10 <sup>i</sup>               | 76.97(8)   | O11 <sup>i</sup> –Dy1–O11              | 138.66(12) |

Symmetry code: (i) -x+1, y, -z+1/2.

**Table S3.** Selected bond angles ( $\omega$ , deg.) for **1<sub>Er</sub>**.

| Angle                                  | $\omega$   | Angle                                  | $\omega$   |
|----------------------------------------|------------|----------------------------------------|------------|
| O4W–Er1–O4W <sup>i</sup>               | 78.8(2)    | O8 <sup>i</sup> –Er1–O2W <sup>i</sup>  | 90.29(14)  |
| O4W <sup>i</sup> –Er1–O8               | 75.30(13)  | O8–Er1–O2W <sup>i</sup>                | 102.12(14) |
| O4W–Er1–O8                             | 77.24(13)  | O8–Er1–O2W                             | 90.29(14)  |
| O4W <sup>i</sup> –Er1–O8 <sup>i</sup>  | 77.24(13)  | O8 <sup>i</sup> –Er1–O2W               | 102.12(14) |
| O4W–Er1–O8 <sup>i</sup>                | 75.30(13)  | O8–Er1–O3W                             | 146.96(13) |
| O4W <sup>i</sup> –Er1–O2W <sup>i</sup> | 149.63(14) | O8 <sup>i</sup> –Er1–O3W               | 68.04(13)  |
| O4W <sup>i</sup> –Er1–O2W              | 71.21(14)  | O8–Er1–O3W <sup>i</sup>                | 68.04(13)  |
| O4W–Er1–O2W <sup>i</sup>               | 71.20(14)  | O8 <sup>i</sup> –Er1–O3W <sup>i</sup>  | 146.96(13) |
| O4W–Er1–O2W                            | 149.64(14) | O2W–Er1–O2W <sup>i</sup>               | 139.0(2)   |
| O4W <sup>i</sup> –Er1–O3W              | 119.92(15) | O2W–Er1–O3W                            | 70.31(15)  |
| O4W <sup>i</sup> –Er1–O3W <sup>i</sup> | 132.01(14) | O2W–Er1–O3W <sup>i</sup>               | 78.93(15)  |
| O4W–Er1–O3W                            | 132.01(14) | O2W <sup>i</sup> –Er1–O3W <sup>i</sup> | 70.31(15)  |
| O4W–Er1–O3W <sup>i</sup>               | 119.92(15) | O2W <sup>i</sup> –Er1–O3W              | 78.93(15)  |
| O8 <sup>i</sup> –Er1–O8                | 144.23(17) | O3W–Er1–O3W <sup>i</sup>               | 81.8(2)    |

Symmetry code: (i) -x+1, y, -z+1/2.

**Table S4.** Hydrogen bonding parameters of structure **1<sub>Dy</sub>**.

| Fragment D–H···A            | Distance/ Å |       |          | D–H···A /° |
|-----------------------------|-------------|-------|----------|------------|
|                             | D–H         | H···A | D···A    |            |
| O2–H2A···O6 <sup>i</sup>    | 0.84        | 1.98  | 2.774(4) | 158        |
| O2–H2B···O8 <sup>ii</sup>   | 0.74        | 2.03  | 2.741(3) | 162        |
| O3–H3A···O6 <sup>iii</sup>  | 0.86        | 1.96  | 2.712(4) | 147        |
| O3–H3B···O4                 | 0.88        | 2.02  | 2.815(4) | 149        |
| O11–H11A···O4 <sup>iv</sup> | 0.80        | 2.00  | 2.798(3) | 176        |
| O11–H11B···O1 <sup>v</sup>  | 0.79        | 1.97  | 2.764(3) | 174        |
| O12–H12A···O8 <sup>vi</sup> | 0.84        | 1.87  | 2.703(3) | 172        |
| O12–H12B···O9               | 0.80        | 2.03  | 2.718(3) | 144        |
| O13–H13A···O10 <sup>i</sup> | 0.83        | 2.35  | 2.658(3) | 103        |
| O13–H13B···O3 <sup>iv</sup> | 0.85        | 1.79  | 2.633(3) | 174        |
| C4–H4A···O6                 | 0.99        | 2.47  | 2.850(4) | 102        |
| C6–H6A···O4 <sup>vii</sup>  | 0.99        | 2.60  | 3.453(4) | 145        |
| C12–H12C···O8               | 0.99        | 2.49  | 2.855(4) | 101        |
| C12–H12D···O10              | 0.99        | 2.43  | 2.808(5) | 102        |

Symmetry codes: (i) 1-x, y, 1/2-z; (ii) x, y, 1/2-z; (iii) 1+x, y, z; (iv) 1/2-x, -1/2+y, 1/2-z; (v) x, 1-y, -1/2+z; (vi) 1+x, y, z; (vii) 1/2-x, 3/2-y, 1-z.

**Table S5.** Hydrogen bonding parameters of structure **1<sub>Er</sub>**.

| Fragment D–H···A             | Distance/ Å |       |          | D–H···A /° |
|------------------------------|-------------|-------|----------|------------|
|                              | D–H         | H···A | D···A    |            |
| O1W–H1WB···O2 <sup>i</sup>   | 0.98        | 1.80  | 2.761(6) | 164        |
| O5W–H1WA···O2 <sup>i</sup>   | 0.92        | 1.80  | 2.708(6) | 170        |
| O5W–H1WB···O4 <sup>ii</sup>  | 0.84        | 2.26  | 2.816(5) | 124        |
| O4W–H1WA···O7 <sup>i</sup>   | 0.85        | 2.02  | 2.712(5) | 137        |
| O4W–H1WB···O6 <sup>ii</sup>  | 0.85        | 1.88  | 2.711(5) | 165        |
| O2W–H1WA···O9 <sup>iii</sup> | 0.86        | 1.95  | 2.769(5) | 160        |
| O2W–H1WB···O4 <sup>iv</sup>  | 0.85        | 1.98  | 2.803(6) | 161        |
| O3W–H1WA···O5W <sup>iv</sup> | 0.85        | 1.88  | 2.623(6) | 145        |
| O3W–H1WB···O2W               | 0.85        | 2.36  | 2.729(6) | 106        |
| C4–H4B···O4 <sup>v</sup>     | 0.99        | 2.59  | 3.448(7) | 144        |
| C6–H6B···O2                  | 0.99        | 2.48  | 2.852(7) | 102        |
| C12–H12A···O6                | 0.99        | 2.49  | 2.855(8) | 101        |
| C12–H12B···O8                | 0.99        | 2.42  | 2.801(8) | 102        |

Symmetry codes: (i) 1-x, y, 1/2-z; (ii) x, y, 1/2-z; (iii) 1-x, 1-y, 1-z; (iv) 1/2+x, 1/2+y, z; (v) 1/2-x, 1/2-y, 1-z.

## Magnetic properties

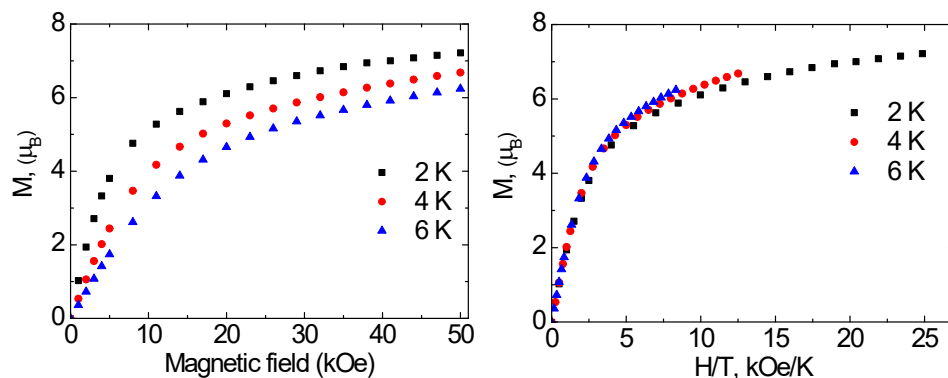

**Figure S3.** The magnetization  $M(T)$  (*left*) and  $M(H/T)$  (*right*) dependences at different temperatures for complex  $\mathbf{1}_{Dy}$ .

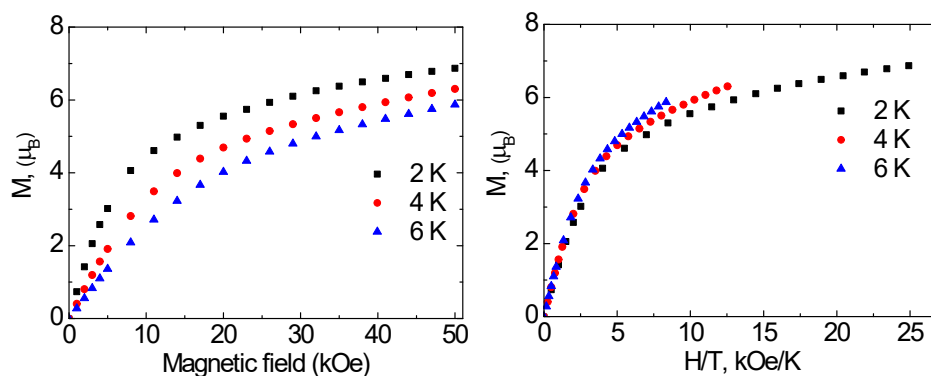

**Figure S4.** The magnetization  $M(T)$  (*left*) and  $M(H/T)$  (*right*) dependences at different temperatures for complex  $\mathbf{1}_{Er}$ .

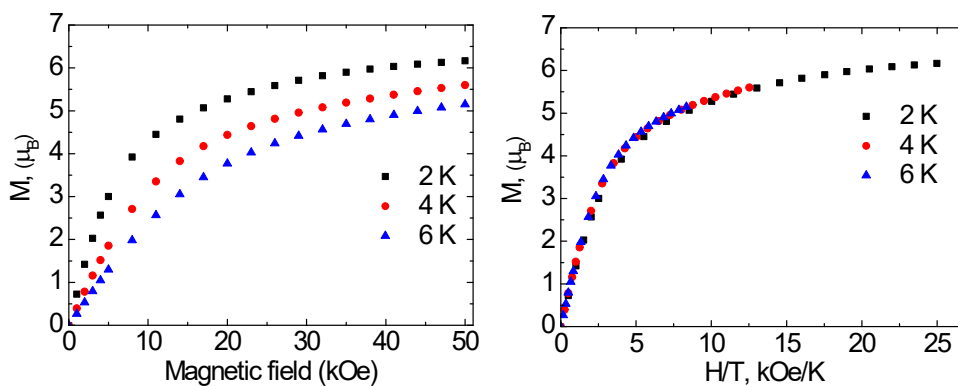

**Figure S5.** The magnetization  $M(T)$  (*left*) and  $M(H/T)$  (*right*) dependences at different temperatures for complex  $\mathbf{1}_{Tm}$ .

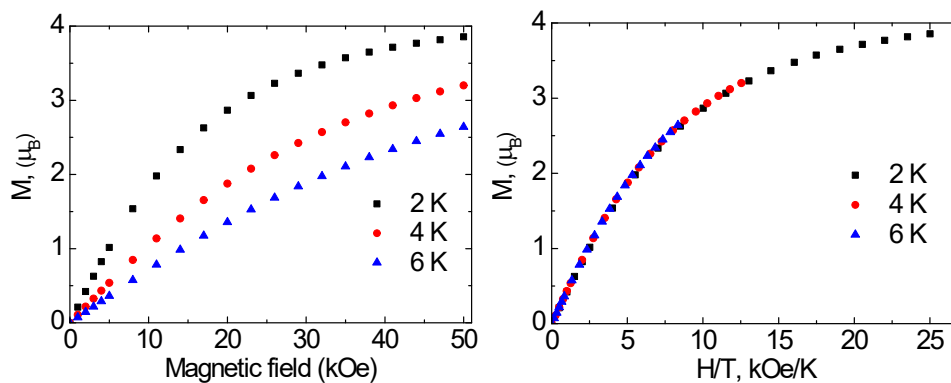

**Figure S6.** The magnetization  $M(T)$  (*left*) and  $M(H/T)$  (*right*) dependences at different temperatures for complex  $\mathbf{1}_{Yb}$ .

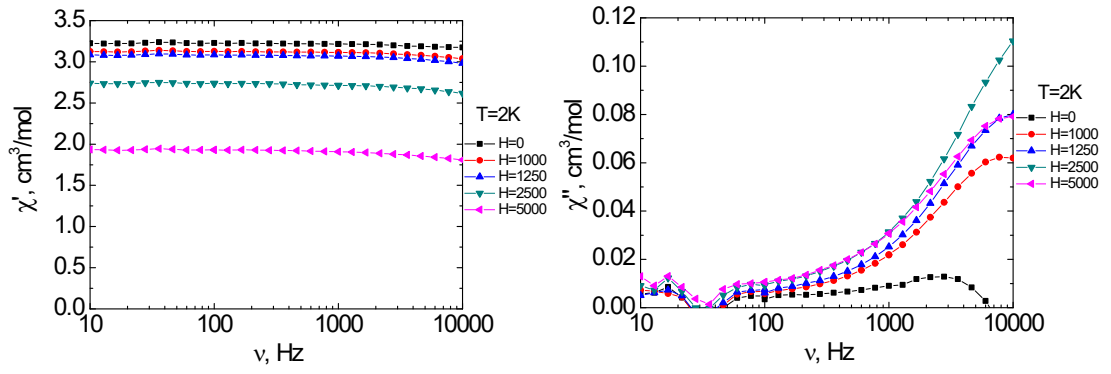

**Figure S7.** Frequency dependencies of the in-phase ( $\chi'$ ) (*left*) and out-of-phase ( $\chi''$ ) (*right*) components of the dynamic magnetic susceptibility of  $\mathbf{1}_{Tb}$  at varied strength of the external static magnetic field and  $T = 2$  K. Solid lines are visual guides.

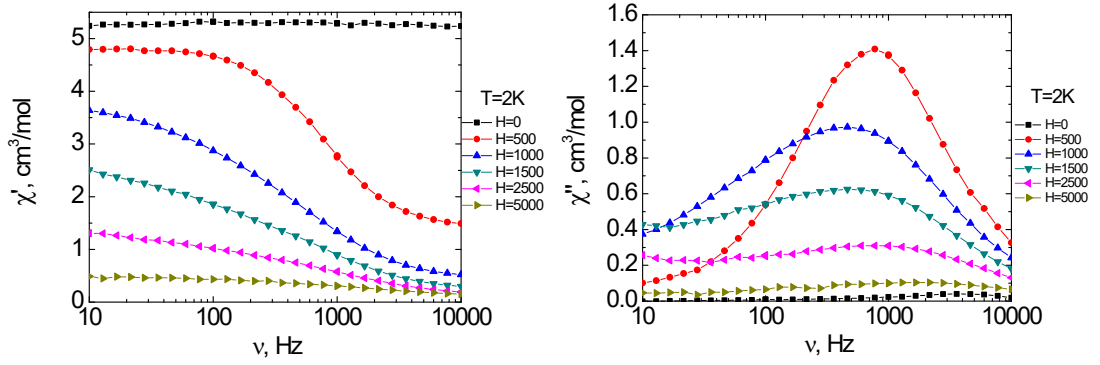

**Figure S8.** Frequency dependencies of the in-phase ( $\chi'$ ) (*left*) and out-of-phase ( $\chi''$ ) (*right*) components of the dynamic magnetic susceptibility of  $\mathbf{1}_{Dy}$  at varied strength of the external static magnetic field and  $T = 2$  K. Solid lines are visual guides.

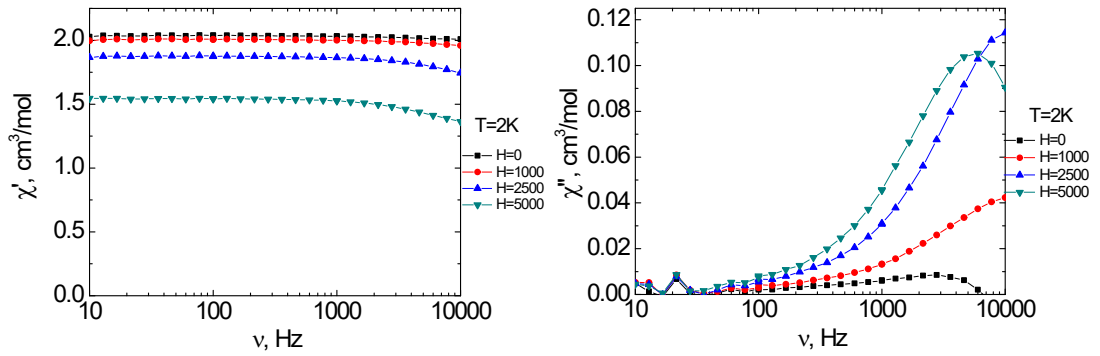

**Figure S9.** Frequency dependencies of the in-phase ( $\chi'$ ) (*left*) and out-of-phase ( $\chi''$ ) (*right*) components of the dynamic magnetic susceptibility of  $\mathbf{1}_{Ho}$  at varied strength of the external static magnetic field and  $T = 2$  K. Solid lines are visual guides.

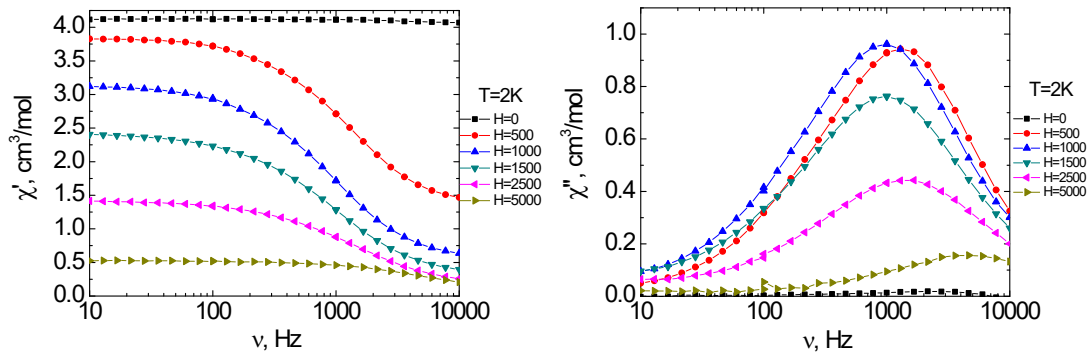

**Figure S10.** Frequency dependencies of the in-phase ( $\chi'$ ) (*left*) and out-of-phase ( $\chi''$ ) (*right*) components of the dynamic magnetic susceptibility of  $\mathbf{1}_{Er}$  at varied strength of the external static magnetic field and  $T = 2$  K. Solid lines are visual guides.

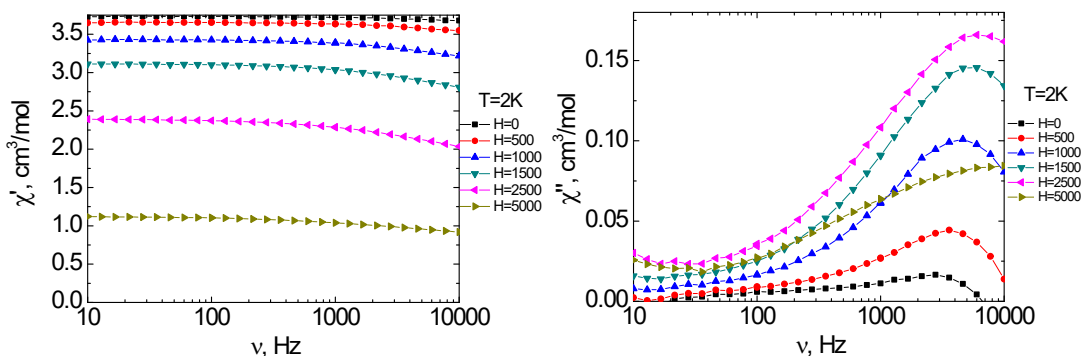

**Figure S11.** Frequency dependencies of the in-phase ( $\chi'$ ) (*left*) and out-of-phase ( $\chi''$ ) (*right*) components of the dynamic magnetic susceptibility of  $\mathbf{1}_{Tm}$  at varied strength of the external static magnetic field and  $T = 2$  K. Solid lines are visual guides.

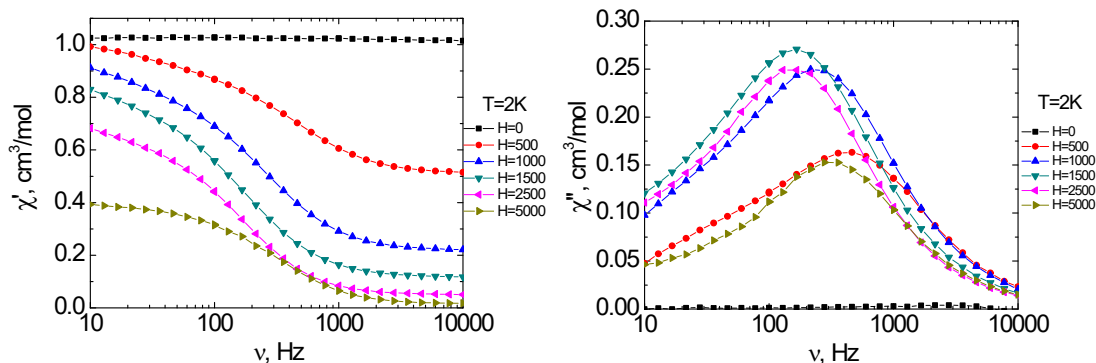

**Figure S12.** Frequency dependencies of the in-phase ( $\chi'$ ) (*left*) and out-of-phase ( $\chi''$ ) (*right*) components of the dynamic magnetic susceptibility of  $\mathbf{1}_{Yb}$  at varied strength of the external static magnetic field and  $T = 2$  K. Solid lines are visual guides.



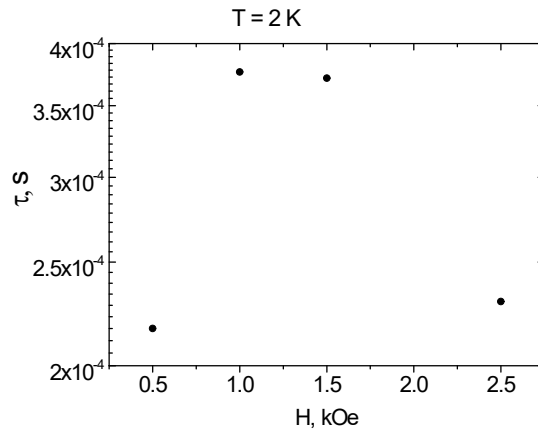

**Figure S13.** The  $\tau$  vs.  $H$  plot for  $1_{Dy}$  at 2 K. The data corresponding to magnetic fields  $H = 0$  and 5000 Oe is omitted because of low corresponding values.

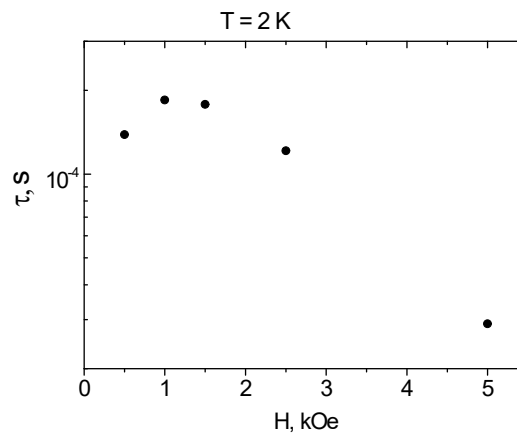

**Figure S14.** The  $\tau$  vs.  $H$  plot for  $1_{Er}$  at 2 K. The data corresponding to magnetic field  $H = 0$  is omitted because of low corresponding values.

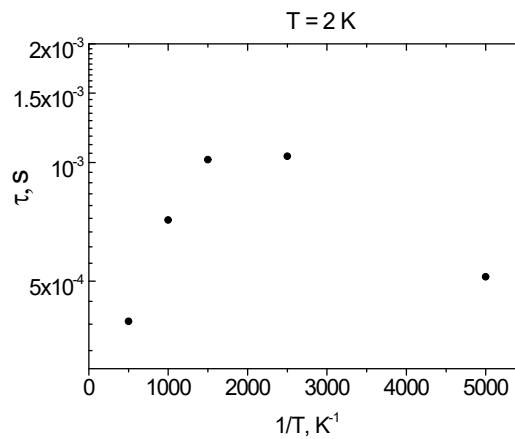

**Figure S15.** The  $\tau$  vs.  $H$  plot for  $1_{Yb}$  at 2 K. The data corresponding to magnetic field  $H = 0$  is omitted because of low corresponding values.

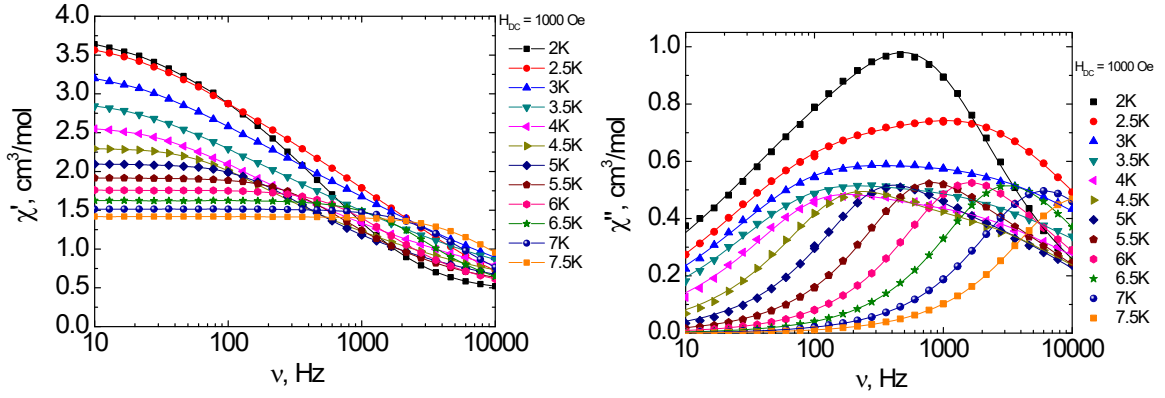

**Figure S16.** Frequency dependences of the in-phase  $\chi'$  (*left*) and out-of-phase  $\chi''$  (*right*) components of the *ac* susceptibility between 2 and 7.5 K for  $\mathbf{1}_{Dy}$  under 1000 Oe *dc*-field. Solid lines are guides for the eyes (*left*), fits by the generalized Debye model for two relaxation processes (*right*).

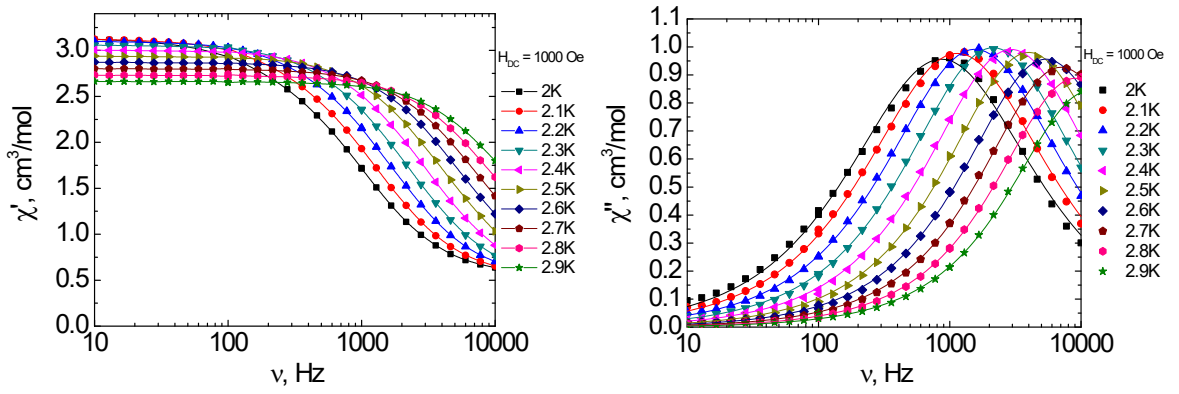

**Figure S17.** Frequency dependences of the in-phase  $\chi'$  (*left*) and out-of-phase  $\chi''$  (*right*) components of the *ac* susceptibility between 2 and 2.9 K for  $\mathbf{1}_{Er}$  under 1000 Oe *dc*-field. Solid lines are guides for the eyes (*left*), fits by the generalized Debye model (*right*).

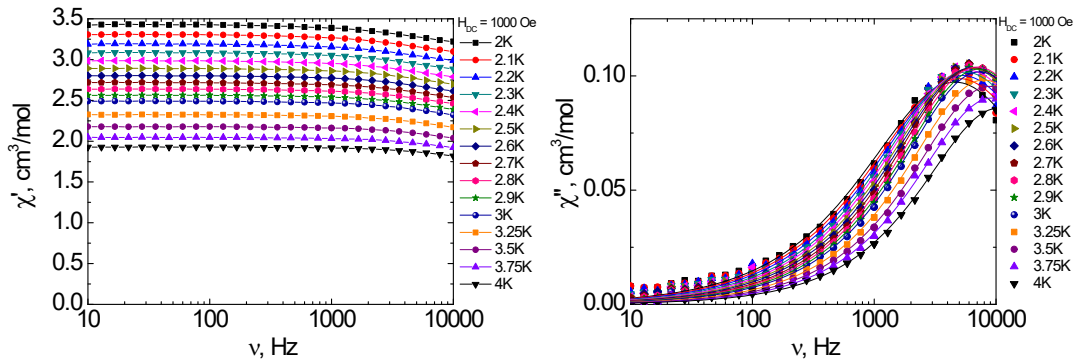

**Figure S18.** Frequency dependences of the in-phase  $\chi'$  (*left*) and out-of-phase  $\chi''$  (*right*) components of the *ac* susceptibility between 2 and 4 K for  $\mathbf{1}_{Tm}$  under 1000 Oe *dc*-field. Solid lines are guides for the eyes (*left*), fits by the generalized Debye model (*right*).

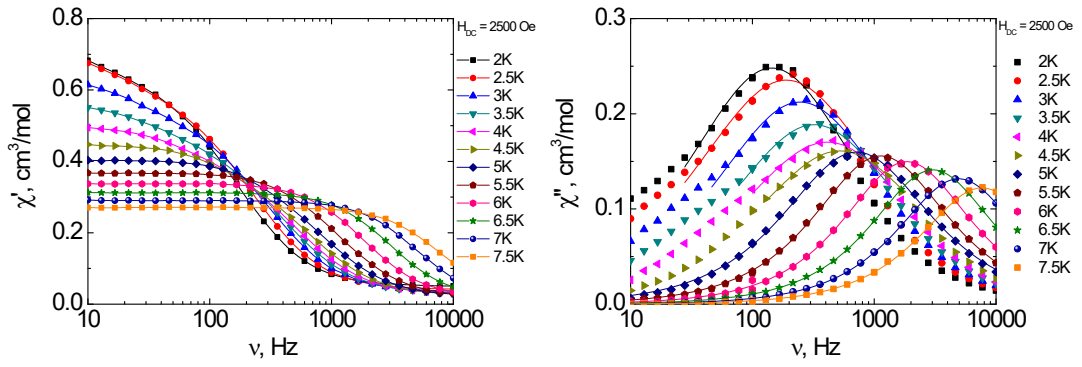

**Figure S19.** Frequency dependences of the in-phase  $\chi'$  (left) and out-of-phase  $\chi''$  (right) components of the  $ac$  susceptibility between 2 and 7.5 K for  $1_{Yb}$  in 2500 Oe  $dc$ -field. Solid lines are guides for the eyes (left), fits by the generalized Debye model (right).

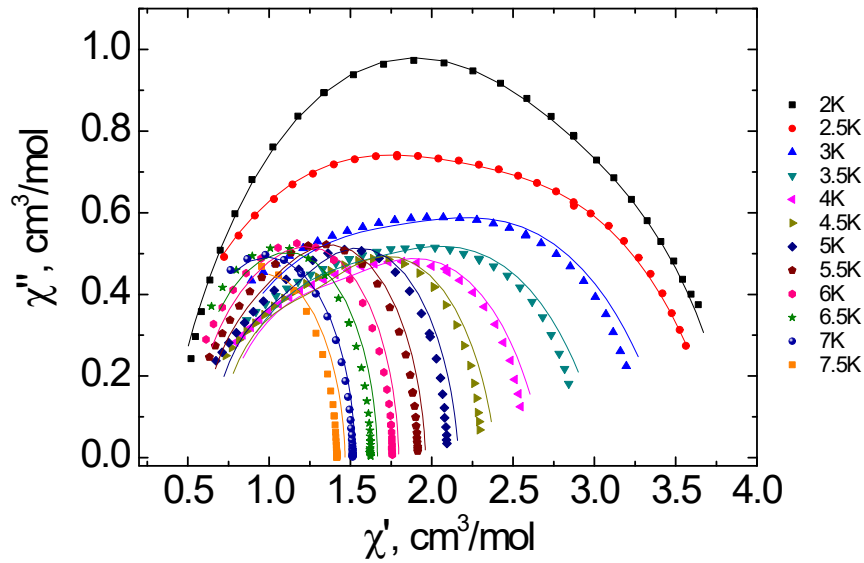

**Figure S20.** Cole-Cole plots for  $1_{Dy}$  measured at 2-7.5 K. The lines represent the fit using the MagSuite v.3.2 software [M. Rouzières, Zenodo (2023); <https://doi.org/10.5281/zenodo.4030310>].

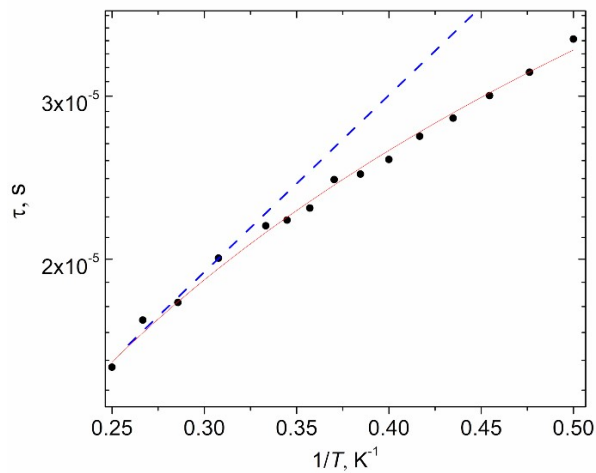

**Figure S21.** The  $\tau$  vs.  $1/T$  plots for  $1_{Tm}$  under 1000 Oe field. Blue dotted line represents the fitting of a high-temperature range by the Orbach mechanism. Red solid line represents the fitting by the Raman relaxation mechanism.

**Table S6.** The best-fit parameters of magnetization relaxation for  $\mathbf{1}_{Tm}$ .

| Compound          | Orbach                              |                     | Raman + direct                                                |                                                               |                    | Raman                                                         |                    |
|-------------------|-------------------------------------|---------------------|---------------------------------------------------------------|---------------------------------------------------------------|--------------------|---------------------------------------------------------------|--------------------|
|                   | $\Delta_{\text{eff}}/k_B, \text{K}$ | $\tau_0, \text{s}$  | $A_{\text{direct}}, \text{K}^{-1}\text{Oe}^{-4}\text{s}^{-1}$ | $C_{\text{Raman}}, \text{s}^{-1}\text{K}^{-n_{\text{Raman}}}$ | $n_{\text{Raman}}$ | $C_{\text{Raman}}, \text{c}^{-1}\text{K}^{-n_{\text{Raman}}}$ | $n_{\text{Raman}}$ |
| $\mathbf{1}_{Tm}$ | 4.4                                 | $5.2 \cdot 10^{-6}$ | –                                                             | –                                                             | –                  | 13672                                                         | 1.12               |

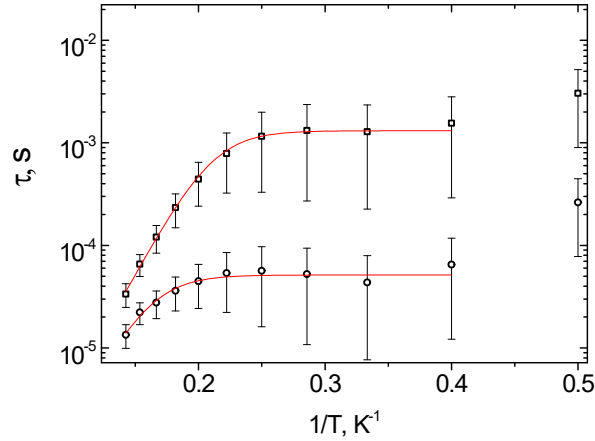

**Figure S22.** The  $\tau$  vs.  $1/T$  plots for  $\mathbf{1}_{Dy}$  under 1000 Oe field with confidence intervals. Red solid lines represent the fittings in the whole temperature range by the sum of the Orbach and QTM relaxation mechanisms.

**Table S7.** The best-fit parameters of magnetization relaxation for  $\mathbf{1}_{Dy}$  (MagSuite Cole-Cole fit).

|           | Orbach + QTM                        |                                           |                    |
|-----------|-------------------------------------|-------------------------------------------|--------------------|
|           | $\Delta_{\text{eff}}/k_B, \text{K}$ | $\tau_0, \text{s}$                        | $B, \text{s}^{-1}$ |
| <b>LF</b> | $52 \pm 2$                          | $2.1 \cdot 10^{-8} \pm 5 \cdot 10^{-9}$   | $762 \pm 52$       |
| <b>HF</b> | 52 (fixed)                          | $1.14 \cdot 10^{-8} \pm 7 \cdot 10^{-10}$ | $19447 \pm 1020$   |

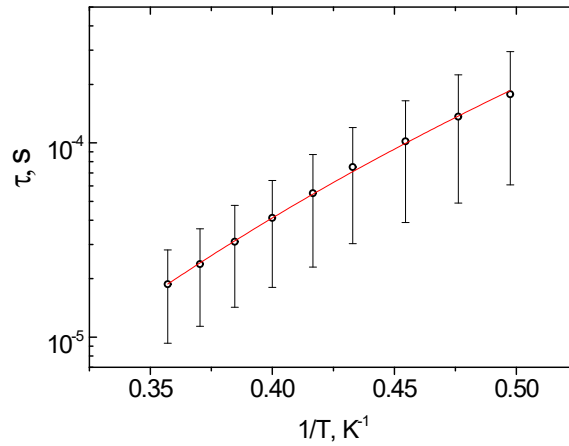

**Figure S23** The  $\tau$  vs.  $1/T$  plots for  $\mathbf{1}_{Er}$  under 1000 Oe field with confidence intervals. Red solid line represents the fittings in the whole temperature range by the Raman relaxation mechanism.

**Table S8.** The best-fit parameters of magnetization relaxation for  $\mathbf{1}_{Er}$  (MagSuite Cole-Cole fit).

| Compound          | Raman                                                         |                    |
|-------------------|---------------------------------------------------------------|--------------------|
|                   | $C_{\text{Raman}}, \text{c}^{-1}\text{K}^{-n_{\text{Raman}}}$ | $n_{\text{Raman}}$ |
| $\mathbf{1}_{Er}$ | $43.0 \pm 3$                                                  | $6.92 \pm 0.09$    |

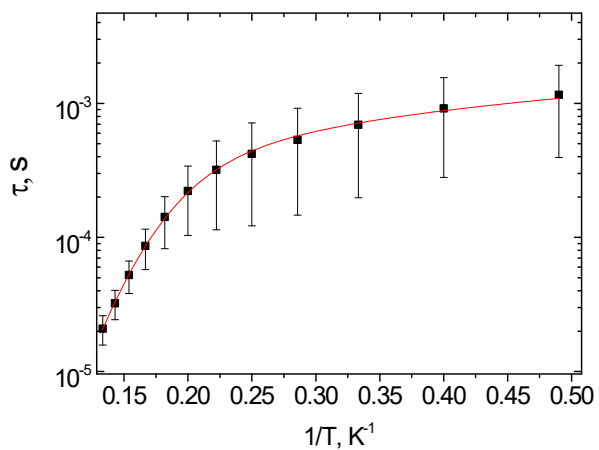

**Figure S24.** The  $\tau$  vs.  $1/T$  plots for  $\mathbf{1}_{\text{Yb}}$  under 2500 Oe field with confidence intervals. Red solid lines represent the fittings in the whole temperature range by the sum of the Raman and direct relaxation mechanisms.

**Table S9.** The best-fit parameters of magnetization relaxation for  $\mathbf{1}_{\text{Yb}}$  (MagSuite Cole-Cole fit).

| Compound                 | Raman + direct                                                |                                                               |                    |
|--------------------------|---------------------------------------------------------------|---------------------------------------------------------------|--------------------|
|                          | $A_{\text{direct}}, \text{K}^{-1}\text{Oe}^{-4}\text{s}^{-1}$ | $C_{\text{Raman}}, \text{s}^{-1}\text{K}^{-n_{\text{Raman}}}$ | $n_{\text{Raman}}$ |
| $\mathbf{1}_{\text{Yb}}$ | $1.15 \cdot 10^{-11} \pm 3 \cdot 10^{-13}$                    | $2.1 \cdot 10^{-2} \pm 5 \cdot 10^{-3}$                       | $7.2 \pm 0.1$      |

## EPR Spectroscopy

Figure S25 shows CW EPR spectra for two complexes of  $V^{4+}$  with diamagnetic  $Y^{3+}$  ion. One complex  $1_Y$  has a 1D-polymeric structure similar to  $1_{Yb}$  and  $1_{Dy}$  complexes, another one has a molecular structure ( $M_Y$ ); both of them were studied in our previous work [16]. CW EPR spectra of  $1_Y$  and  $M_Y$  are very similar; they can be simulated using close sets of parameters  $g = [1.974 \ 1.974 \ 1.938]$  and  $A = [184 \ 184 \ 518]$  MHz ( $1_Y$ ), and  $g = [1.975 \ 1.975 \ 1.938]$  and  $A = [183 \ 183 \ 519]$  MHz ( $M_Y$ ), thus reflecting similar local environment of  $V^{4+}$  ions. Both  $T_m(T)$  dependences for  $M_Y$  and for  $1_Y$  have no peculiarity and show monotonic behavior; however, absolute values of  $T_m$  for  $1_Y$  were found shorter. Thus, with additional verifications,  $M_Y$  was used as a reference in Figure 7.

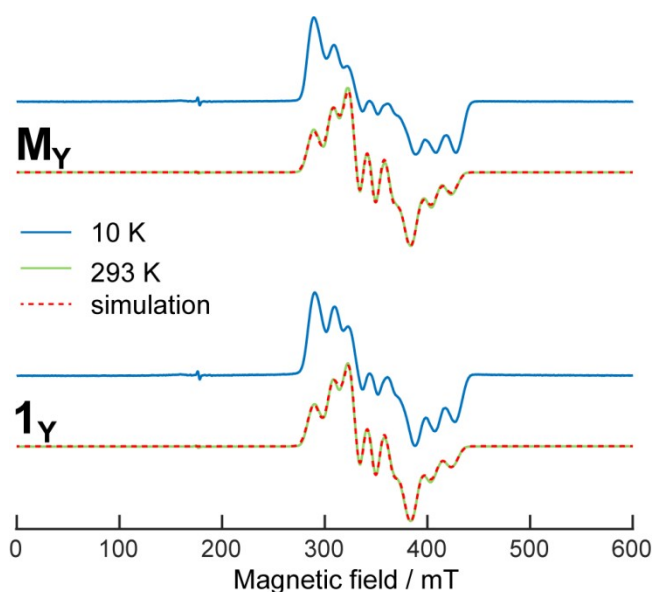

**Figure S25.** CW EPR spectra of  $M_Y$  and  $1_Y$  at 293 K and 10 K. Simulations are shown in red.

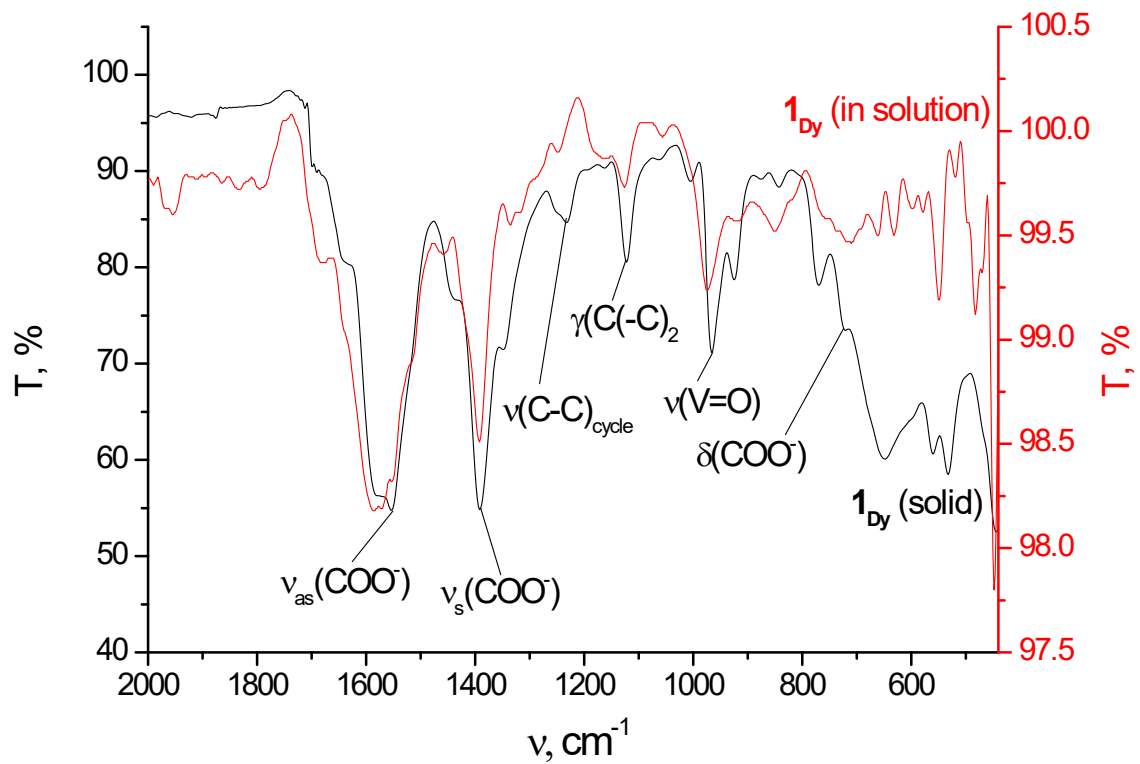

**Figure S26.** The IR spectra (fingerprint region) of solid sample (black line) and aqueous solution (red line) of compound **1<sub>Dy</sub>**.
